# Supplementary material for: One step emission tunable synthesis of PEG coated Ag2S NIR quantum dots and the development of receptor targeted drug delivery vehicles thereof
Source: Royal Society of Chemistry journal article supplement (doi:10.1039/c5tb02599k), 2016-01-01
Supplement: c5tb02599k1.pdf [file c5tb02599k1.pdf]

**One step emission tunable synthesis of PEG coated Ag<sub>2</sub>S NIR quantum dots and the development of receptor targeted drug delivery vehicles thereof**

*Didar Asik,<sup>†</sup> Fatma Demir Duman,<sup>†</sup> M. Baris Yagci,<sup>‡</sup> Havva Yagci Acar<sup>\*†</sup>*

**Table S1.** Size distribution and zeta potential of Ag<sub>2</sub>S-PEG QDs in water.

| Rxn Code | Hydrodynamic Size (Dh) <sup>a</sup> (nm) |                |        | PDI <sup>b</sup> | Zeta Pot. (mV) |
|----------|------------------------------------------|----------------|--------|------------------|----------------|
|          | Intensity                                | Volume         | Number |                  |                |
| QD1      | 14.87                                    | 8.37           | 6.19   | 0.216            | -1.23          |
| QD2      | 21.50                                    | 2.78 (83 %)    | 2.47   | 0.357            | -21.5 (50 %)   |
|          |                                          | 11.06 (16.9 %) |        |                  | +3.88 (50 %)   |
| QD3      | 15.24 (75.5 %)                           | 9.45           | 2.70   | 0.444            | -5.66          |
|          | 298 (17.3 %)                             |                |        |                  |                |
| QD4      | 16.39                                    | 3.65           | 1.77   | 0.257            | -12.1 (49.1 %) |
|          |                                          |                |        |                  | +2.42 (34.5 %) |
| QD5      | 12.73                                    | 7.22           | 5.36   | 0.197            | -4.10          |
| QD6      | 42.60                                    | 11.91          | 8.04   | 0.449            | -1.01          |
| QD7      | 169.7 (88 %)                             | 18.09          | 11.90  | 0.479            | -7.55 (83.3 %) |
|          | 18.89 (10 %)                             |                |        |                  | -32.1 (16.7 %) |

<sup>a</sup> Hydrodynamic diameter measured by DLS. <sup>b</sup> Size distribution calculated by DLS

**Table S2.** Size distribution and zeta potential of Ag<sub>2</sub>S-PEG QDs before and after DOX loading in water.

| Sample | Zeta Potential (mV)   | Hydrodynamic size by DLS (nm)                       |
|--------|-----------------------|-----------------------------------------------------|
| QD     | -13 (st. dev. 6.31)   | 10.45/St.Dev: 2.86 (N)*<br>13.08/St.Dev: 4.47 (V)** |
| QD-DOX | -10.8 (st. dev: 6.83) | 10.84/St.Dev:2.9(N)*<br>13.40/St.Dev:4.7(V)**       |

\* Number average, \*\* Volume average

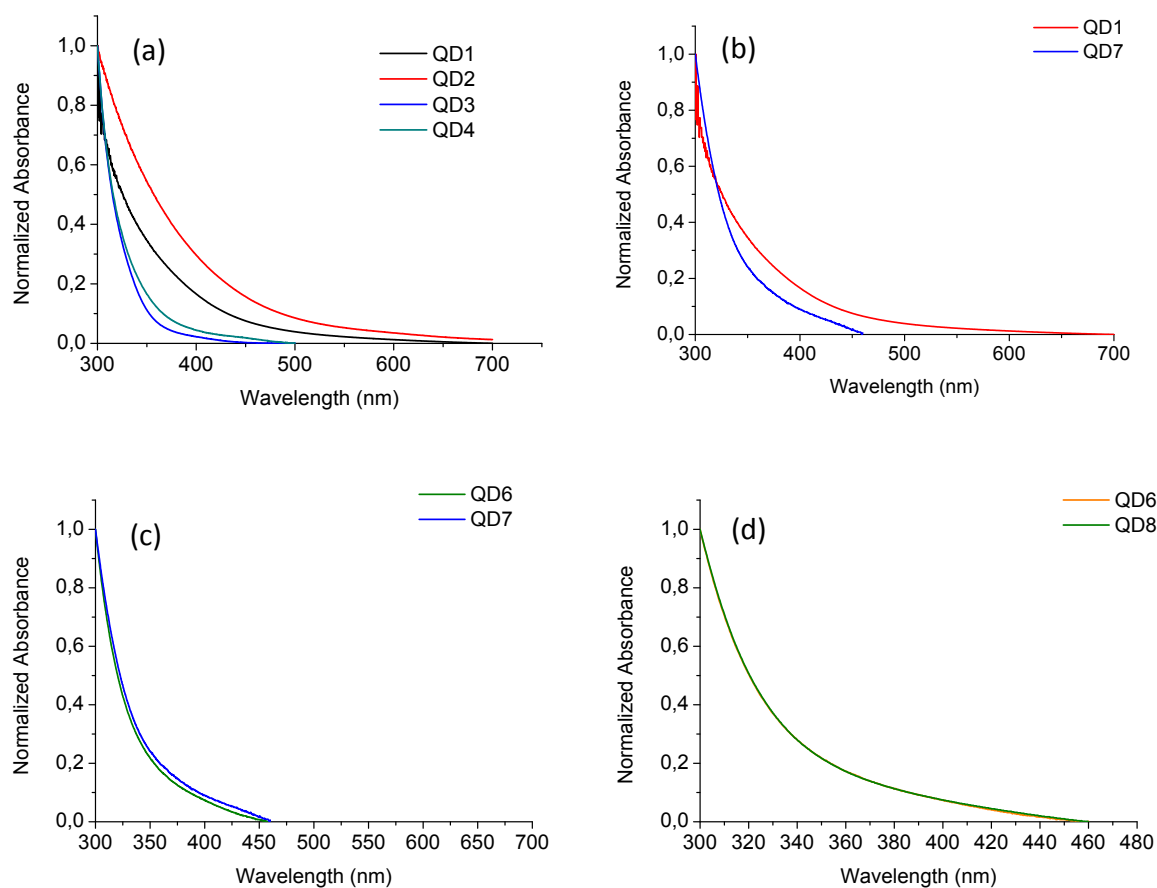

**Figure S1.** Normalized absorbance spectra of Ag<sub>2</sub>S-PEG QDs.

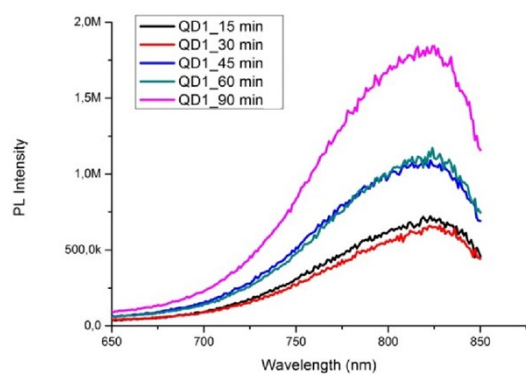

**Figure S2.** Photoluminescence spectra of QD1 at different reaction times (15, 30, 45, 60 and 90 minutes).

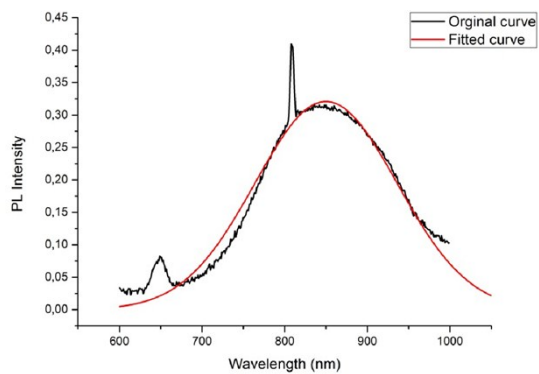

**Figure S3.** Original and fitted photoluminescence spectrum of QD1. Original curve was fitted by OriginPro 9.0 software equation  $(y=y_0+A*\exp(-0.5*((x-x_c)/w)^2))$ .

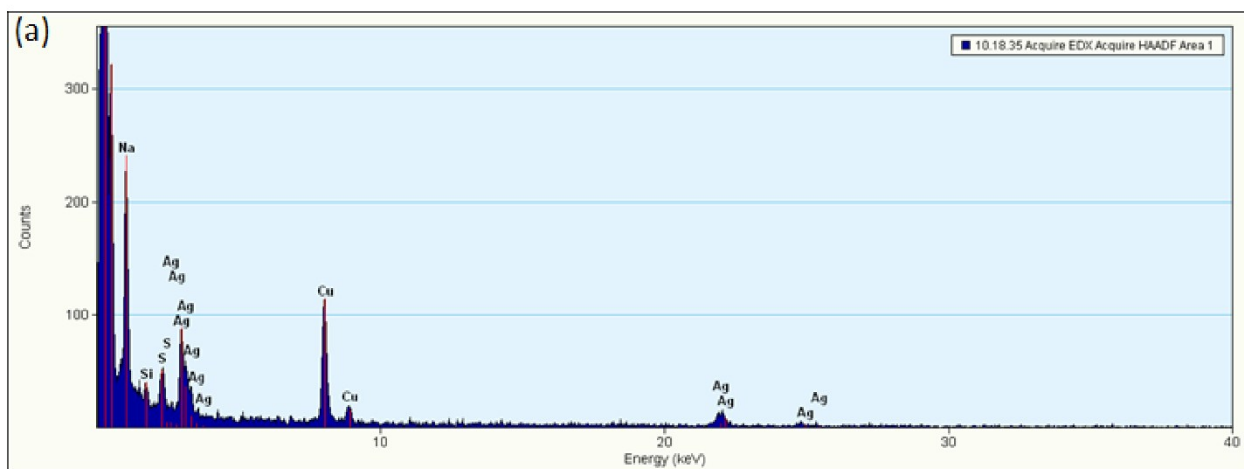

**Figure S4.** The EDX image of QD8 .

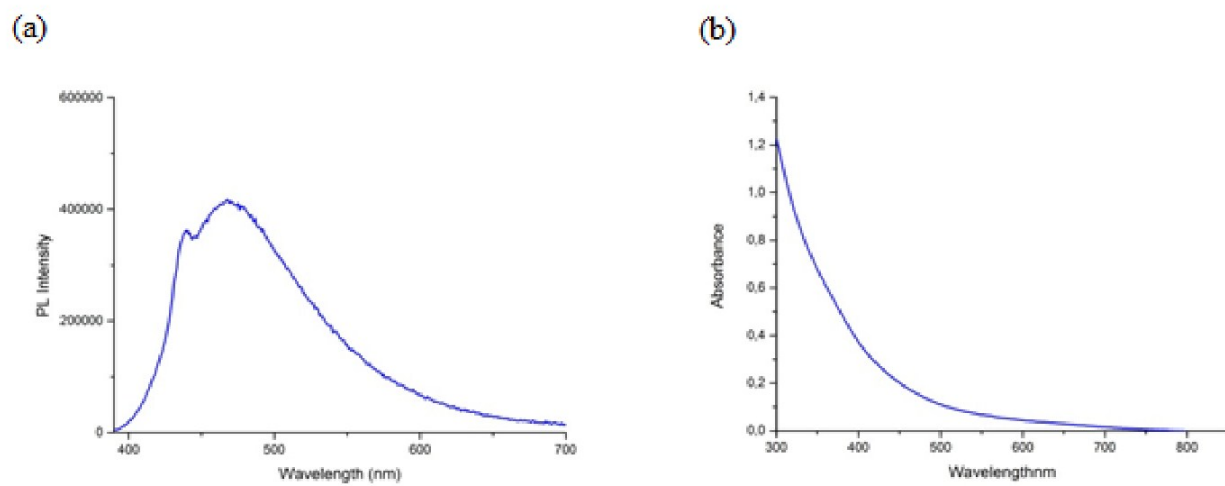

**Figure S5.** Photoluminescence (a) and absorbance (b) spectrum of folic acid tagged  $\text{Ag}_2\text{S}$ -PEG QD (QD-FA).

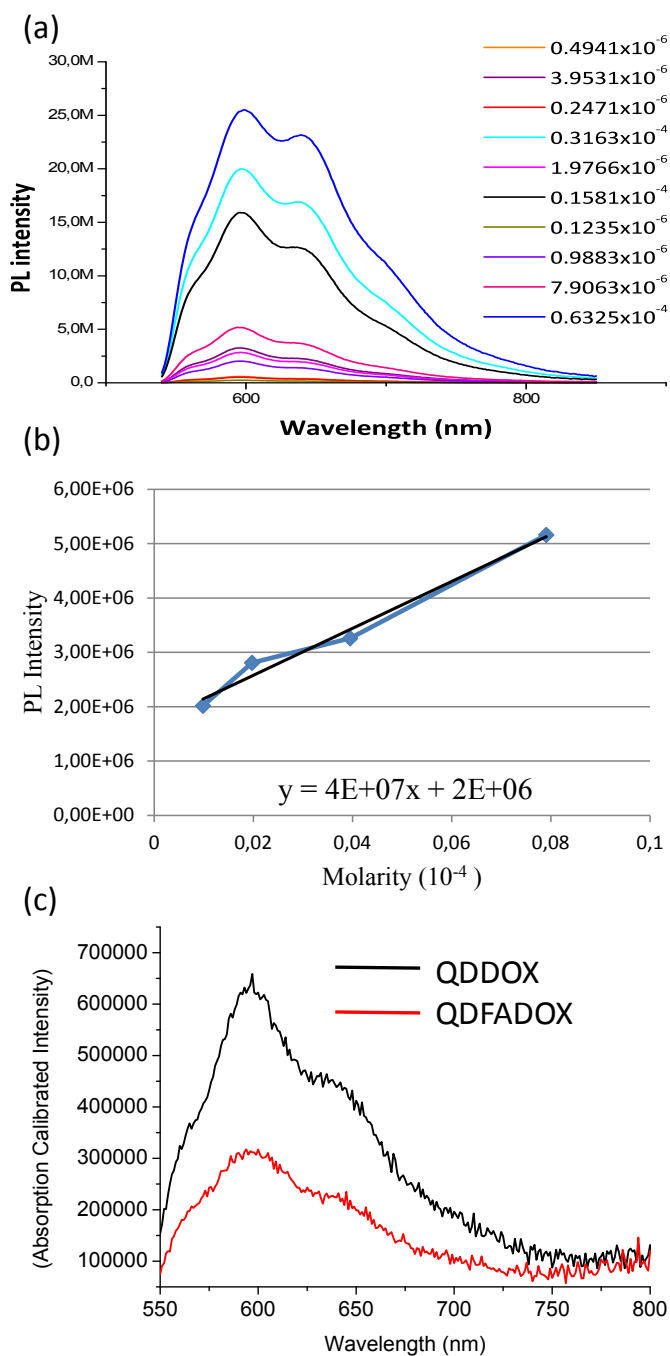

**Figure S6.** (a) Photoluminescence spectra ( $\lambda_{exc}$ : 520 nm) of Doxorubicin hydrochloride at different concentration ( $0.1235 \times 10^{-6}$  to  $0.6325 \times 10^{-4}$  M). (b) Concentration dependence of DOX.HCl luminescence intensity at 595 nm. (c) Photoluminescence spectra of QD-FA-DOX and QD-DOX between 550-800 nm.

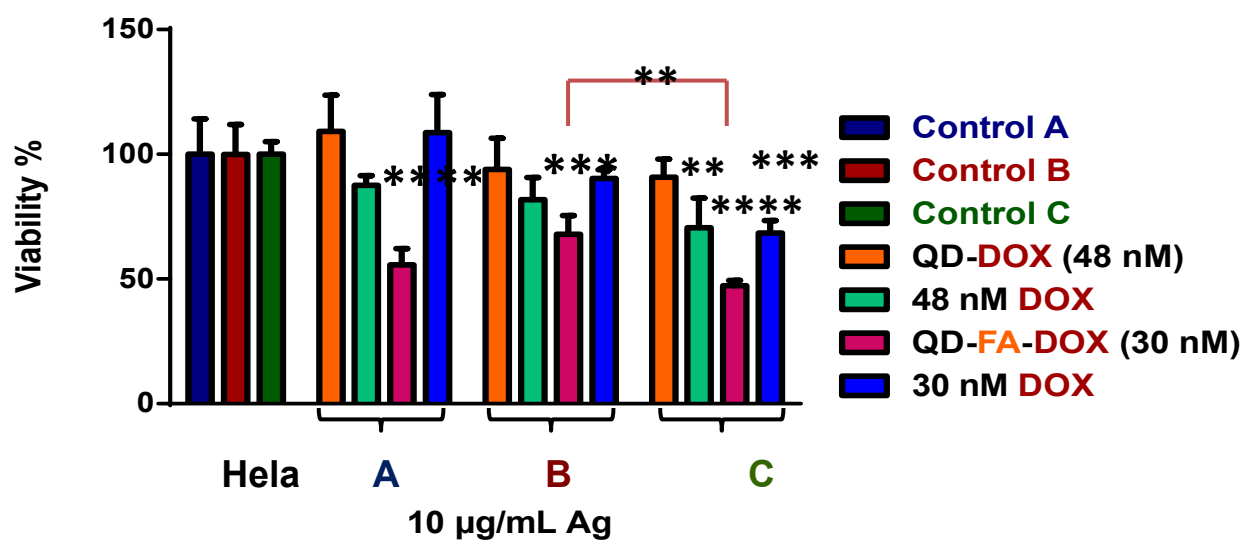

**Figure S7.** In vitro viability of HeLa cells incubated 24 hours with QD-FA-DOX at 10 µg Ag /mL (0.836 mg QD/mL), QD-DOX at 10 µg Ag /mL (0.672 mg QD/mL) and with free DOX (30-48 nM). In vitro cell viability studies were performed in (I) complete DMEM, (II) folic acid free medium with 2 mM folic acid, and (III) folic acid free medium. Significant difference was observed between control groups and QD treated cells (one-way ANOVA with Tukey's multiple comparison at  $p < 0.05$  (\*),  $p < 0.01$  (\*\*),  $p < 0.001$  (\*\*\*) and  $p < 0.0001$  (\*\*\*\*)).
